# Supplementary material
Source: PubMed Central journal article supplement (PMC2706961)
Supplement: mmc1.pdf [file mmc1.pdf]

**Supplemental Data**

**Genome-wide Study of Families with Absolute Pitch**

**Reveals Linkage to 8q24.21 and Locus Heterogeneity**

Elizabeth Theusch, Analabha Basu, and Jane Gitschier

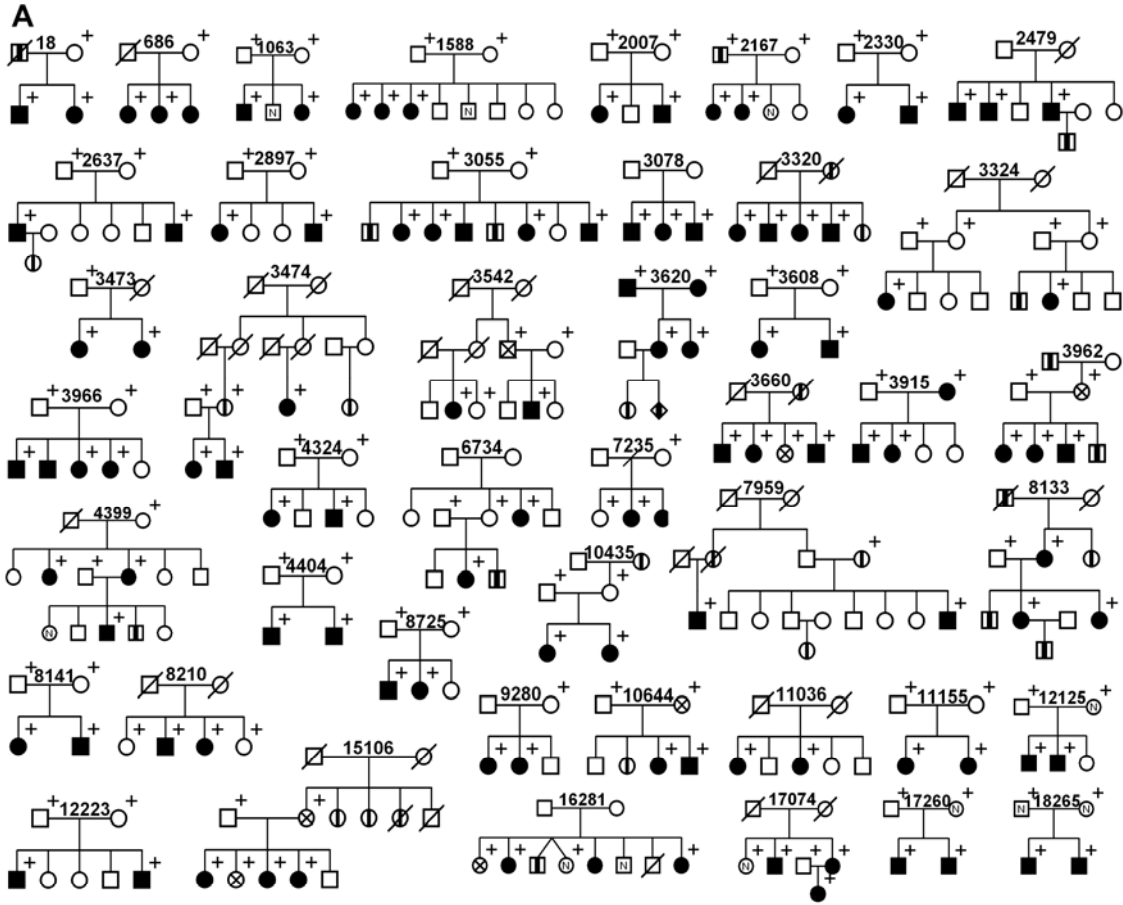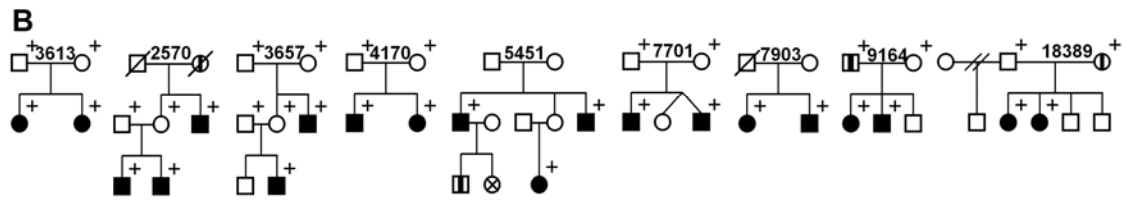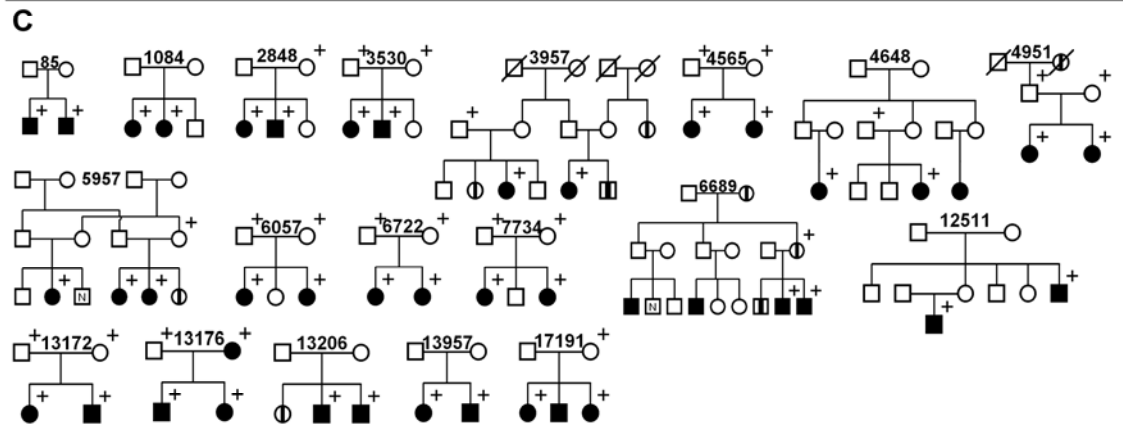

Passed test for AP    
  AP reported, not tested    
  AP reported, did not pass test  
 No AP, did not pass test    
  No AP reported, not tested    
 + Genotyped

**Figure S1. Pedigrees of Families Used in Linkage Study**

(A) Collection of 45 families of European ancestry.

(B) One family of Indian ancestry (3613) and 8 families of Ashkenazi Jewish ancestry.

(C) Nineteen families of East Asian ancestry.

The key to the symbols is shown at the bottom of the figure.

**Table S1. Ethnicities of Families and Contributions of Each Family to Top Linkage Regions**

| Family | Self-Reported Ethnicity               | Population <sup>a</sup> | 7q22.3 <sup>b</sup> | 8q21.11 <sup>b</sup> | 8q24.21 <sup>b</sup> | 9p21.3 <sup>b</sup> |
|--------|---------------------------------------|-------------------------|---------------------|----------------------|----------------------|---------------------|
| 18     | British/German                        | Eu                      | +                   | 0                    | -                    | +                   |
| 686    | German/Italian                        | Eu                      | 0                   | +                    | 0                    | +                   |
| 1063   | German/Serbian                        | Eu                      | +                   | -                    | +                    | +                   |
| 1588   | Finnish                               | Eu                      | -                   | +                    | +                    | +                   |
| 2007   | Polish/Austrian/Swedish/Scottish      | Eu                      | 0                   | +                    | +                    | +                   |
| 2167   | German/Danish/English/Irish           | Eu                      | +                   | +                    | 0                    | 0                   |
| 2330   | Ukrainian/Russian                     | Eu                      | 0                   | 0                    | 0                    | -                   |
| 2479   | French/Norwegian/German               | Eu                      | +                   | +                    | +                    | +                   |
| 2637   | German/Swiss                          | Eu                      | 0                   | -                    | +                    | -                   |
| 2897   | Polish/Scottish/French Canadian       | Eu                      | -                   | +                    | 0                    | +                   |
| 3055   | Swedish                               | Eu                      | +                   | +                    | +                    | +                   |
| 3078   | Caucasian                             | Eu                      | +                   | +                    | -                    | +                   |
| 3320   | English                               | Eu                      | -                   | -                    | +                    | +                   |
| 3324   | Dutch                                 | Eu                      | +                   | +                    | -                    | +                   |
| 3473   | Caucasian                             | Eu                      | 0                   | -                    | -                    | 0                   |
| 3474   | German                                | Eu                      | +                   | -                    | -                    | +                   |
| 3542   | Polish                                | Eu                      | +                   | -                    | +                    | -                   |
| 3608   | Mennonite (German/Dutch)              | Eu                      | 0                   | 0                    | -                    | +                   |
| 3620   | French/German (¼ AJ)                  | Eu                      | +                   | -                    | 0                    | +                   |
| 3660   | English/Slovakian/German/Austrian     | Eu                      | +                   | +                    | +                    | -                   |
| 3915   | ¾ Scottish/English/German, ¼ Japanese | Eu                      | +                   | +                    | +                    | -                   |
| 3962   | French Canadian                       | Eu                      | -                   | +                    | +                    | +                   |
| 3966   | European                              | Eu                      | +                   | +                    | -                    | +                   |
| 4324   | Swedish/Norwegian/Polish/Danish       | Eu                      | +                   | -                    | +                    | 0                   |
| 4399   | Caucasian                             | Eu                      | +                   | +                    | +                    | +                   |
| 4404   | Caucasian                             | Eu                      | 0                   | +                    | 0                    | +                   |
| 6734   | Italian/French/English/Irish/Scottish | Eu                      | +                   | +                    | +                    | -                   |
| 7235   | Italian/Slovak/French/English/Dutch   | Eu                      | +                   | +                    | 0                    | -                   |
| 7959   | Caucasian                             | Eu                      | +                   | +                    | +                    | +                   |
| 8133   | Scottish/German/Native American       | Eu                      | -                   | +                    | +                    | +                   |
| 8141   | Swedish/German/Bulgarian              | Eu                      | 0                   | 0                    | -                    | +                   |
| 8210   | English/Irish/Scandinavian            | Eu                      | 0                   | 0                    | +                    | -                   |
| 8725   | English/Scottish                      | Eu                      | +                   | -                    | +                    | +                   |
| 9280   | German/Italian                        | Eu                      | 0                   | +                    | -                    | 0                   |
| 10435  | Irish/French/Scottish/German          | Eu                      | -                   | 0                    | +                    | 0                   |
| 10644  | Dutch                                 | Eu                      | +                   | 0                    | +                    | 0                   |
| 11036  | German                                | Eu                      | -                   | 0                    | +                    | -                   |
| 11155  | Italian/German/Irish                  | Eu                      | 0                   | +                    | +                    | 0                   |
| 12125  | Hungarian/German/Irish                | Eu                      | -                   | +                    | +                    | -                   |
| 12223  | Caucasian LDS (Mormon)                | Eu                      | +                   | +                    | +                    | 0                   |
| 15106  | English                               | Eu                      | -                   | +                    | +                    | -                   |
| 16281  | English/Irish                         | Eu                      | 0                   | +                    | -                    | 0                   |
| 17074  | English/Irish/Dutch/Scottish          | Eu                      | +                   | -                    | -                    | -                   |
| 17260  | British/Swedish                       | Eu                      | 0                   | 0                    | +                    | +                   |
| 18265  | British/German/Italian                | Eu                      | 0                   | +                    | +                    | 0                   |
| 3613   | Indian                                | I                       | 0                   | +                    | 0                    | +                   |
| 2570   | Ashkenazi Jewish                      | AJ                      | +                   | -                    | -                    | +                   |
| 3657   | Ashkenazi Jewish                      | AJ                      | -                   | -                    | -                    | -                   |
| 4170   | AJ (Russian)                          | AJ                      | -                   | +                    | 0                    | 0                   |
| 5451   | AJ (Russian)                          | AJ                      | -                   | +                    | -                    | +                   |
| 7701   | AJ (Hungarian/Russian/Lithuanian)     | AJ                      | 0                   | 0                    | 0                    | 0                   |
| 7903   | Ashkenazi Jewish                      | AJ                      | 0                   | 0                    | 0                    | 0                   |
| 9164   | Jewish (Middle Eastern/Romanian)      | AJ                      | 0                   | 0                    | 0                    | 0                   |
| 18389  | Ashkenazi Jewish                      | AJ                      | 0                   | 0                    | 0                    | -                   |

| Family | Ethnicity        | Population | 7q22.3 <sup>b</sup> | 8q21.11 <sup>b</sup> | 8q24.21 <sup>b</sup> | 9p21.3 <sup>b</sup> |
|--------|------------------|------------|---------------------|----------------------|----------------------|---------------------|
| 85     | Chinese          | E Asian    | +                   | 0                    | 0                    | -                   |
| 1084   | Chinese          | E Asian    | -                   | -                    | 0                    | -                   |
| 2848   | Chinese          | E Asian    | -                   | +                    | 0                    | +                   |
| 3530   | Chinese          | E Asian    | +                   | +                    | +                    | -                   |
| 3957   | Japanese         | E Asian    | +                   | +                    | -                    | +                   |
| 4565   | Chinese          | E Asian    | -                   | 0                    | -                    | 0                   |
| 4648   | Chinese          | E Asian    | -                   | +                    | 0                    | -                   |
| 4951   | Filipino         | E Asian    | +                   | 0                    | 0                    | -                   |
| 5957   | Taiwanese        | E Asian    | +                   | +                    | 0                    | +                   |
| 6057   | Filipino         | E Asian    | 0                   | +                    | 0                    | 0                   |
| 6722   | Chinese          | E Asian    | +                   | -                    | +                    | -                   |
| 6689   | Chinese          | E Asian    | -                   | 0                    | +                    | +                   |
| 7734   | Chinese          | E Asian    | +                   | -                    | -                    | -                   |
| 12511  | Filipino/Chinese | E Asian    | +                   | +                    | -                    | +                   |
| 13172  | Chinese          | E Asian    | +                   | +                    | -                    | -                   |
| 13176  | Taiwanese        | E Asian    | +                   | +                    | +                    | +                   |
| 13206  | Chinese          | E Asian    | +                   | -                    | 0                    | 0                   |
| 13957  | South Korean     | E Asian    | -                   | 0                    | -                    | +                   |
| 17191  | Taiwanese        | E Asian    | +                   | -                    | +                    | -                   |

<sup>a</sup> All families of European (Eu), Ashkenazi Jewish (AJ), and Indian (I) ancestry are included in the Eu/AJ/I sample set, while the Eu sample set excludes families of Ashkenazi Jewish and Indian descent.

<sup>b</sup> Contributions were considered positive (+) if they were  $\geq 0.01$  multipoint nonparametric exponential logarithm of the odds (LOD), negative (-) if they were  $\leq -0.01$  LOD, and neutral (0) if they were between  $-0.01$  and  $0.01$  LOD.

Refer to Figure S1 for pedigrees of these families.
